# Supplementary material
Source: publisher figshare collection journal article supplement (https://sage.figshare.com/ndownloader/files/13086023)
Supplement: Supplementary file 1 [file 13086023]

## Supplementary Materials

### Study 2

#### Immoral Person item.

“How immoral is [this person]?”, answered on a 7-point scale, ranging from 1 (not at all) to 7 (extremely).

#### Immoral Person Analyses.

##### *Correlations*

|                                                           | Responsibility       | Punishment           | Blame                | Agency               | Consequences         |
|-----------------------------------------------------------|----------------------|----------------------|----------------------|----------------------|----------------------|
| <b>Immoral Person – American</b><br><i>M</i> = 4.01 (.92) | .35***<br>[.19, .60] | .57***<br>[.45, .80] | .57***<br>[.43, .77] | .29***<br>[.09, .39] | -.03<br>[-.37, .27]  |
| <b>Immoral Person – Chinese</b><br><i>M</i> = 3.65 (.88)  | .29***<br>[.18, .56] | .73***<br>[.61, .83] | .74***<br>[.62, .83] | .04<br>[-.12, .20]   | .27***<br>[.17, .63] |

##### *Multiple Regression*

|                            | Immoral Person Judgment                                               |
|----------------------------|-----------------------------------------------------------------------|
| Culture                    | <i>b</i> = -.29,<br><i>SE</i> = .11, <i>p</i> = .011<br>CI[-.52,-.07] |
| Agency                     | <i>b</i> = .24,<br><i>SE</i> = .08, <i>p</i> = .002<br>CI[.09,.39]    |
| Culture x Agency           | <i>b</i> = -.25,<br><i>SE</i> = .11, <i>p</i> = .024<br>CI[-.47,-.03] |
| Agency Simple Slopes China | <i>b</i> = -.01,<br><i>SE</i> = .08, <i>p</i> = .887<br>CI[-.17,.15]  |

|                                     |                                            |              |
|-------------------------------------|--------------------------------------------|--------------|
| Agency Simple Slopes<br>US          | $b = .24$ ,<br>$SE = .08$ ,<br>$p = .002$  | CI[.08,.40]  |
| Consequences                        | $b = -.05$ ,<br>$SE = .09$ ,<br>$p = .613$ | CI[-.22,.13] |
| Culture x Consequences              | $b = .28$ ,<br>$SE = .11$ ,<br>$p = .014$  | CI[.06,.51]  |
| Consequences Simple Slopes<br>China | $b = .24$ ,<br>$SE = .07$ ,<br>$p < .001$  | CI[.10,.38]  |
| Consequences Simple Slopes<br>US    | $b = -.05$ ,<br>$SE = .09$ ,<br>$p = .615$ | CI[-.23,.13] |

### Full Factorial Analyses

|                                    | Responsibility |             |             | Punishment |             |             | Blame    |             |             |
|------------------------------------|----------------|-------------|-------------|------------|-------------|-------------|----------|-------------|-------------|
|                                    | <i>b</i>       | <i>S.E.</i> | <i>C.I.</i> | <i>b</i>   | <i>S.E.</i> | <i>C.I.</i> | <i>b</i> | <i>S.E.</i> | <i>C.I.</i> |
| Culture                            | .37***         | .08         | [.20,.53]   | .21*       | .11         | [.00,.42]   | .18      | .11         | [-.03,.38]  |
| Agency                             | .39***         | .06         | [.27,.50]   | .35***     | .08         | [.21,.50]   | .39***   | .08         | [.25,.54]   |
| Culture x Agency                   | -.18*          | .08         | [-.35,-.02] | -.37***    | .11         | [-.58,-.16] | -.42***  | .11         | [-.63,-.21] |
| Consequences                       | -.03           | .07         | [-.17,.10]  | -.05       | .09         | [-.23,.12]  | -.08     | .09         | [-.25,.09]  |
| Culture x<br>Consequences          | .30***         | .09         | [.13,.47]   | .35**      | .11         | [.13,.57]   | .43***   | .11         | [.22,.65]   |
| Agency x<br>Consequences           | .15*           | .07         | [.02,.28]   | .00        | .08         | [-.16,.17]  | .04      | .08         | [-.13,.20]  |
| Culture x Agency<br>x Consequences | -.19*          | .08         | [-.35,-.02] | -.07       | .11         | [-.28,.14]  | -.15     | .11         | [-.36,.06]  |

### Study 3

#### Full Factorial Analyses

|                                                     | <b>Responsibility</b>                          | <b>Punishment</b>                              |
|-----------------------------------------------------|------------------------------------------------|------------------------------------------------|
| Culture                                             | $F(1, 542) = 14.88$<br>$p < .001$<br>$d = .33$ | $F(1, 542) = 59.27$<br>$p < .001$<br>$d = .66$ |
| Agency Condition                                    | $F(1, 542) = 63.14$<br>$p < .001$<br>$d = .68$ | $F(1, 542) = 73.04$<br>$p < .001$<br>$d = .73$ |
| Consequences Condition                              | $F(1, 542) = 36.99$<br>$p < .001$<br>$d = .52$ | $F(1, 542) = 19.04$<br>$p < .001$<br>$d = .37$ |
| Culture x Agency Condition                          | $F(1, 542) = 3.14$<br>$p = .077$<br>$d = .15$  | $F(1, 542) = 18.60$<br>$p < .001$<br>$d = .37$ |
| Culture x Consequences Condition                    | $F(1, 542) = 19.16$<br>$p < .001$<br>$d = .38$ | $F(1, 542) = .11$<br>$p = .737$<br>$d = .03$   |
| Agency Condition x Consequences Condition           | $F(1, 542) = 10.12$<br>$p = .002$<br>$d = .27$ | $F(1, 542) = .79$<br>$p = .375$<br>$d = .08$   |
| Culture x Agency Condition x Consequences Condition | $F(1, 542) = 2.74$<br>$p = .098$<br>$d = .14$  | $F(1, 542) = .69$<br>$p = .406$<br>$d = .07$   |

#### Agency x Consequences 2-way Interaction Predicting Responsibility Judgements

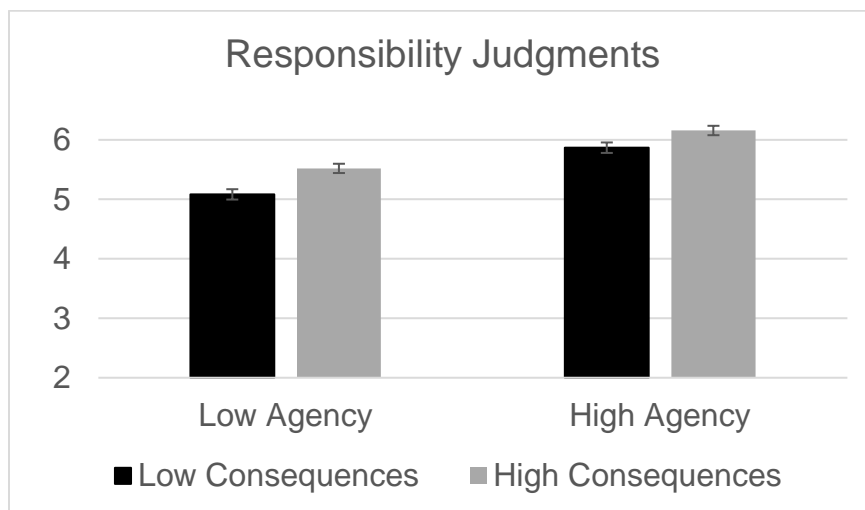

Error bars represent +1 and -1 standard errors of the mean

## Study 4

### Immoral Behavior Item.

“How immoral is [target]?”, answered on a scale from 1(not immoral at all) to 7(extremely immoral).

### Immoral Person Analyses

#### *Correlations*

|                                                            | Responsibility       | Punishment           | Blame                | Agency               | Consequences         | Social Harmony       |
|------------------------------------------------------------|----------------------|----------------------|----------------------|----------------------|----------------------|----------------------|
| <b>Immoral Person – American</b><br><i>M</i> = 3.96 (1.10) | .49***<br>[.38, .59] | .67***<br>[.59, .74] | .62***<br>[.53, .70] | .41***<br>[.29, .52] | .14*<br>[.00, .27]   | .31***<br>[.18, .43] |
| <b>Immoral Person – Chinese</b><br><i>M</i> = 3.94 (1.02)  | .39***<br>[.27, .50] | .56***<br>[.46, .64] | .59***<br>[.50, .67] | .46***<br>[.35, .56] | .22***<br>[.09, .34] | .45***<br>[.34, .55] |

#### *Multiple Regression*

|                        | Immoral Person Judgment |             |             |
|------------------------|-------------------------|-------------|-------------|
|                        | <i>b</i>                | <i>S.E.</i> | <i>C.I.</i> |
| Culture                | .30**                   | .10         | [.10,.49]   |
| Agency                 | .48***                  | .07         | [.34,.63]   |
| Culture x Agency       | -.001                   | .10         | [-.19,.19]  |
| Consequences           | .10                     | .07         | [-.04,.23]  |
| Culture x Consequences | .13                     | .09         | [-.05,.31]  |

### Immoral Behavior Analyses

#### *Correlations*

|                                                              | Responsibility       | Punishment           | Blame                | Agency               | Consequences         | Social Harmony       |
|--------------------------------------------------------------|----------------------|----------------------|----------------------|----------------------|----------------------|----------------------|
| <b>Immoral Behavior – American</b><br><i>M</i> = 4.64 (1.10) | .47***<br>[.36, .57] | .58***<br>[.48, .67] | .60***<br>[.50, .68] | .32***<br>[.19, .44] | .43***<br>[.31, .54] | .53***<br>[.42, .62] |
| <b>Immoral Behavior – Chinese</b><br><i>M</i> = 3.95 (1.02)  | .42***<br>[.31, .52] | .49***<br>[.38, .58] | .46***<br>[.35, .56] | .28***<br>[.16, .40] | .51***<br>[.41, .60] | .51***<br>[.41, .60] |

### *Multiple Regression*

|                        | Immoral Behavior Judgment |             |             |
|------------------------|---------------------------|-------------|-------------|
|                        | <i>b</i>                  | <i>S.E.</i> | <i>C.I.</i> |
| Culture                | .57***                    | .09         | [.40,.74]   |
| Agency                 | .28***                    | .07         | [.15,.41]   |
| Culture x Agency       | .02                       | .09         | [-.15,.20]  |
| Consequences           | .38***                    | .06         | [.26,.50]   |
| Culture x Consequences | .15                       | .08         | [-.01,.31]  |

### **Anger Consensus Item.**

“How much anger do you feel toward [person]?” answered on a scale from 1(none at all) to 7(a whole lot).

### **Anger Consensus Analyses**

#### *Correlations*

|                                                          | Responsibility       | Punishment           | Blame                | Agency               | Consequences         | Social Harmony       |
|----------------------------------------------------------|----------------------|----------------------|----------------------|----------------------|----------------------|----------------------|
| <b>Anger Consensus American</b><br><i>M</i> = 4.44 (.86) | .31***<br>[.18, .43] | .41***<br>[.29, .52] | .40***<br>[.28, .51] | .29***<br>[.16, .41] | .37***<br>[.25, .48] | .41***<br>[.29, .52] |
| <b>Anger Consensus Chinese</b><br><i>M</i> = 4.74 (.90)  | .30***<br>[.18, .42] | .48***<br>[.37, .58] | .53***<br>[.43, .62] | .39***<br>[.27, .50] | .25***<br>[.12, .37] | .45***<br>[.34, .55] |

### *Multiple Regression*

|                        | <b>Angry Consensus</b> |             |             |
|------------------------|------------------------|-------------|-------------|
|                        | <i>b</i>               | <i>S.E.</i> | <i>C.I.</i> |
| Culture                | .47***                 | .08         | [.31,.63]   |
| Agency                 | .23***                 | .06         | [.11,.35]   |
| Culture x Agency       | .13                    | .08         | [-.03,.37]  |
| Consequences           | .29***                 | .06         | [.18,.40]   |
| Culture x Consequences | -.07                   | .08         | [-.22,.09]  |

#### **Anger Consensus as a Mediator.**

We tested whether anger consensus might mediate the relationship between consequences and each of the dependent variables for the Chinese participants. We found the indirect effect of each of these mediations was significant: Responsibility .04, CI[.01, .12], Punishment .11, CI[.03, .24], Blame .13, CI[.04, .28].

To compare if anger consensus might mediate the relationship above and beyond the mediating role of social harmony disruption, we entered both anger consensus and social harmony disruption simultaneously as mediators. For responsibility, we found social harmony disruption's indirect effect was significant, .20 CI[.06, .36], while anger consensus's was not, .02 CI[-.01, .10]. For punishment, social harmony disruption's indirect effect was significant, .43 CI[.23, .63] and so was anger consensus's, .06 CI[.01, .19]. For blame, social harmony disruption's indirect effect was significant, .41 CI[.19, .65] and so was anger consensus's, .09 CI[.02, .23]. These results suggest that anger consensus also plays an important role in mediating the relationship between perceived consequences and accountability judgments for the Chinese.

## Full Factorial Analyses

### *First Model (with Consequences as a predictor)*

|                                 | Responsibility |             |             | Punishment |             |             | Blame    |             |             |
|---------------------------------|----------------|-------------|-------------|------------|-------------|-------------|----------|-------------|-------------|
|                                 | <i>b</i>       | <i>S.E.</i> | <i>C.I.</i> | <i>b</i>   | <i>S.E.</i> | <i>C.I.</i> | <i>b</i> | <i>S.E.</i> | <i>C.I.</i> |
| Culture                         | .70***         | .07         | [.57,.84]   | 1.10***    | .08         | [.94,1.25]  | .76***   | .08         | [.61,.91]   |
| Agency                          | .56***         | .05         | [.45,.66]   | .48***     | .06         | [.36,.60]   | .64***   | .06         | [.52,.75]   |
| Culture x Agency                | -.41***        | .07         | [-.54,-.27] | -.26**     | .08         | [-.43,-.10] | -.39***  | .08         | [-.54,-.24] |
| Consequences                    | .11*           | .05         | [.01,.20]   | .06        | .06         | [-.05,.17]  | .03      | .08         | [-.07,.14]  |
| Culture x Consequences          | .34***         | .07         | [.06,.38]   | .35***     | .08         | [.20,.50]   | .35***   | .07         | [.20,.49]   |
| Agency x Consequences           | -.01           | .05         | [-.10,.09]  | .11*       | .05         | [.01,.22]   | .05      | .06         | [-.06,.15]  |
| Culture x Agency x Consequences | -.10           | .06         | [-.22,.03]  | -.31***    | .07         | [-.45,-.16] | -.24***  | .07         | [-.38,-.10] |

### *Second Model (with social harmony disruption as a predictor)*

|                                              | Responsibility |             |             | Punishment |             |             | Blame    |             |             |
|----------------------------------------------|----------------|-------------|-------------|------------|-------------|-------------|----------|-------------|-------------|
|                                              | <i>b</i>       | <i>S.E.</i> | <i>C.I.</i> | <i>b</i>   | <i>S.E.</i> | <i>C.I.</i> | <i>b</i> | <i>S.E.</i> | <i>C.I.</i> |
| Culture                                      | .56***         | .07         | [.41,.70]   | .87***     | .08         | [.71,1.03]  | .55***   | .08         | [.40,.70]   |
| Agency                                       | .56***         | .05         | [.46,.66]   | .49***     | .06         | [.38,.60]   | .63***   | .05         | [.53,.74]   |
| Culture x Agency                             | -.44***        | .08         | [-.59,-.29] | -.31***    | .08         | [-.47,-.14] | -.42***  | .08         | [-.58,-.27] |
| Social Harmony Disruption                    | .06            | .05         | [-.03,.15]  | .14***     | .05         | [.04,.23]   | .11*     | .05         | [.01,.20]   |
| Culture x Social Harmony Disruption          | .45***         | .07         | [.31,.59]   | .54***     | .08         | [.40,.69]   | .55***   | .07         | [.02,.43]   |
| Agency x Social Harmony Disruption           | .05            | .04         | [-.03,.13]  | .13**      | .04         | [.05,.22]   | .07      | .04         | [-.01,.15]  |
| Culture x Agency x Social Harmony Disruption | -.13*          | .06         | [-.25,.00]  | -.28***    | .07         | [-.41,-.15] | -.21***  | .07         | [-.34,-.09] |

## **General Discussion**

### **Meta-Analysis**

Following previous procedure for internal meta-analyses (Goh, Hall, & Rosenthal, 2016), we summarized results from each of the studies. Due to similarity in research design (except for Study 3) and the use of identical instruments, the fixed-effects approach (Borenstein, Hedges, Higgins, & Rothstein, 2009) was taken in which the mean effect size was weighted so that larger samples received more weight, assuming that there is a true effect size that the studies are all estimating for a given comparison. All correlations were Fisher's  $z$  transformed for analyses and converted back to Pearson correlations for presentation. We summarize effect sizes within culture rather than provide a summarized effect size of an interaction term because the resulting semipartial correlation as an estimate of summarized effect size does not indicate the shape of the interaction. Moreover, 95% confidence intervals allow readers to examine which effect sizes are significantly different from each other within and across cultures.
